# Supplementary material
Source: PubMed Central journal article supplement (PMC6738812)
Supplement: jin-0009-0094-s02.pdf [file jin-0009-0094-s02.pdf]

# Supplementary information

## Supplementary Table 1.

Type I IFN gene expression by MDDC in response to reovirus infection

|        | 6h<br>Mock          | 6 h<br>Reo           | 24 h<br>Mock        | 24 h<br>Reo      |
|--------|---------------------|----------------------|---------------------|------------------|
| IFNA1  | 5.88E-05 ± 2.77E-05 | 4.27E-01 ± 3.65E-01* | 4.22E-04 ± 8.25E-05 | 5.287 ± 1.61 *   |
| IFNA2  | 5.88E-05 ± 2.77E-05 | 6.96E-02 ± 4.96E-02  | 7.35E-04 ± 4.82E-04 | 1.596 ± 5.78E-01 |
| IFNA4  | 5.88E-05 ± 2.77E-05 | 2.66E-02 ± 2.57E-02  | 3.04E-04 ± 7.42E-05 | 0.767 ± 4.10E-01 |
| IFNA5  | 5.88E-05 ± 2.77E-05 | 7.23E-03 ± 4.06E-03  | 3.04E-04 ± 7.42E-05 | 0.153 ± 5.33E-02 |
| IFNA6  | 4.01E-04 ± 3.68E-04 | 4.38E-02 ± 3.51E-02  | 3.54E-04 ± 5.13E-05 | 1.22 ± 4.38E-01  |
| IFNA7  | 5.88E-05 ± 2.77E-05 | 7.41E-03 ± 7.35E-03  | 8.01E-04 ± 5.48E-04 | 0.18 ± 9.61E-02  |
| IFNA8  | 5.88E-05 ± 2.77E-05 | 1.69E-01 ± 1.5E-01*  | 5.74E-04 ± 2.62E-04 | 2.22 ± 7.41E-01  |
| IFNA10 | 9.46E-05 ± 2.41E-05 | 5.32E-03 ± 5.26E-03  | 3.04E-04 ± 7.42E-05 | 0.173 ± 6.46E-02 |
| IFNA14 | 5.88E-05 ± 2.77E-05 | 1.42E-01 ± 1.28E-01* | 3.04E-04 ± 7.42E-05 | 2.67 ± 1.30 *    |
| IFNA16 | 5.88E-05 ± 2.77E-05 | 6.00E-03 ± 3.34E-03  | 3.04E-04 ± 7.42E-05 | 0.034 ± 1.18E-02 |
| IFNA17 | 1.55E-04 ± 9.55E-05 | 1.60E-03 ± 1.57E-03  | 5.72E-04 ± 2.67E-04 | 0.24 ± 1.55E-01  |
| IFNA21 | 5.88E-05 ± 2.77E-05 | 1.43E-02 ± 1.06E-02  | 9.65E-04 ± 7.11E-04 | 0.42 ± 2.65E-01  |
| IFNB   | 8.40E-04 ± 7.33E-04 | 3.72 ± 3.00          | 9.54E-03 ± 5.38E-03 | 11.87 ± 5.92     |

Data are presented as mean±SEM. MDDC, monocyte derived-dendritic cells (n=3 and 5 at 6 and 24 h respectively).  
\* p<0.05 Mann-Whitney test, when compared to Reo-CBMC (Figure 6A).
